# Supplementary material for: Nitrogen stress response and stringent response are coupled in Escherichia coli
Source: PubMed Central journal article supplement (PMC4066584; doi:10.1038/ncomms5115), 2014-06-20
Supplement: NIHMS58565-supplement-1.pdf [file NIHMS58565-supplement-1.pdf]

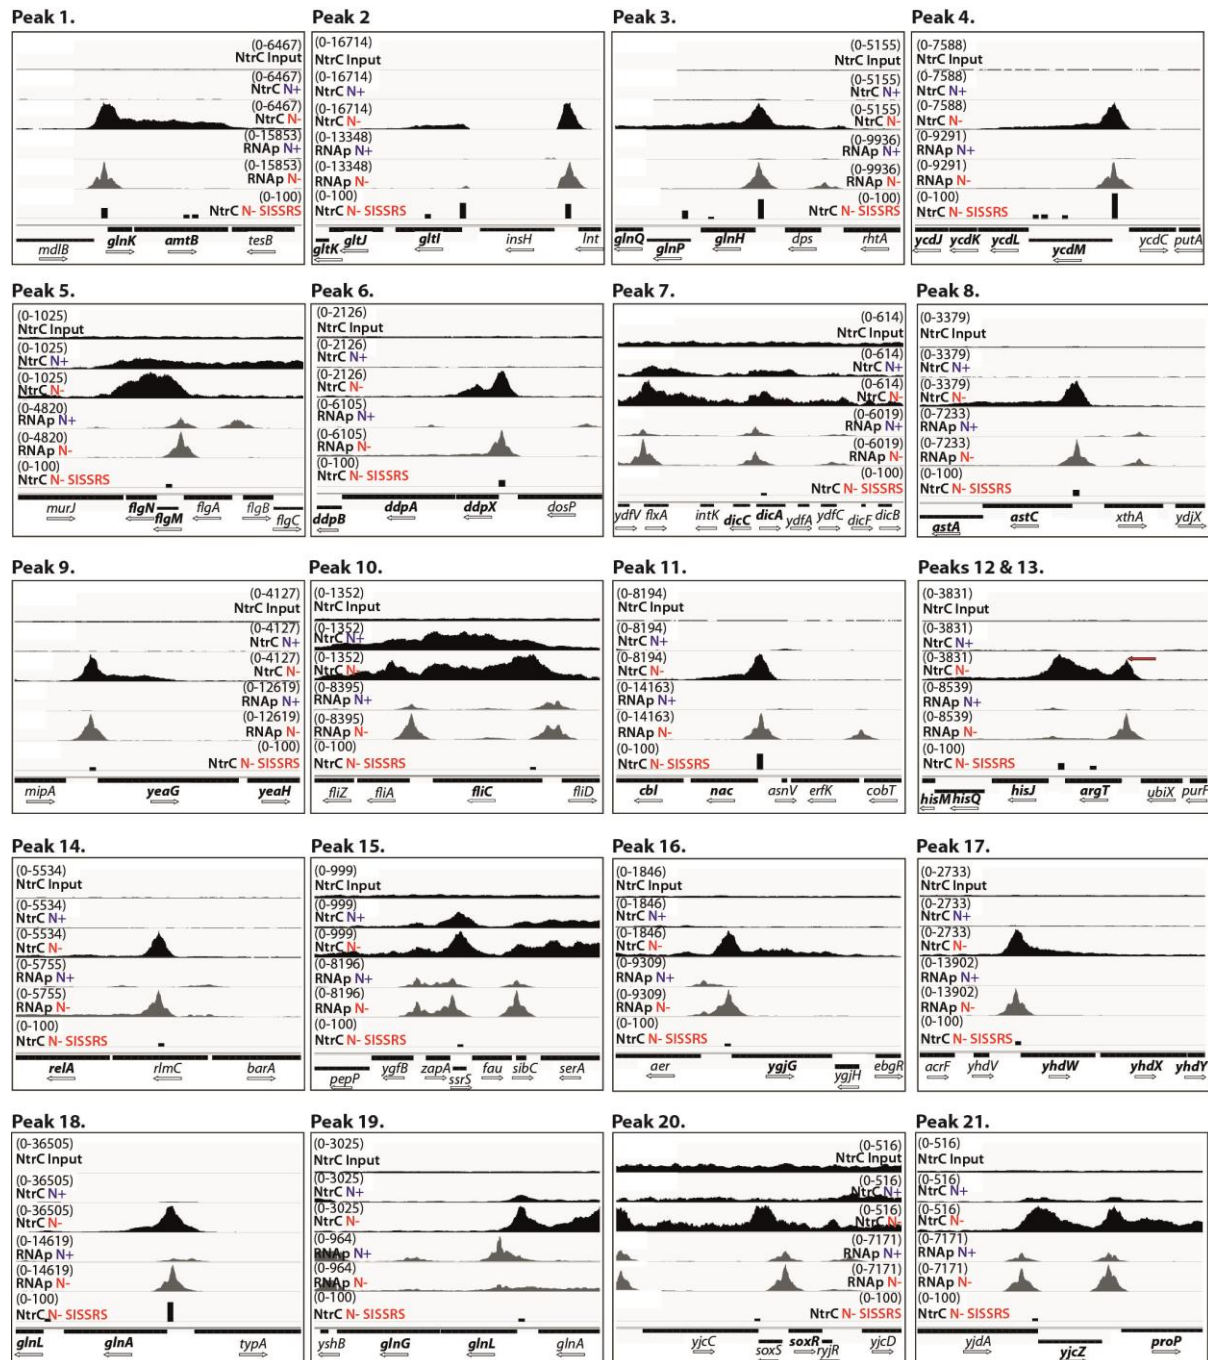

**Supplementary Figure 1.** Screenshots of Integrative Genome Viewer<sup>1</sup> with tracks showing the binding profiles (tag density) as measured by ChIP-seq of NtrC (black) and RNAP (gray) in N non-starved (denoted as N+) and N starved (denoted as N-) *E. coli* aligned against the upstream regions of all the transcription units shown in Table 1. Tracks with the input DNA control tag density (denoted as input) and with the genomic loci bound by NtrC identified by

the SISRIS peak-calling algorithm<sup>2</sup> at t=N- are also shown for comparison. Red arrow (panel “Peaks 12 & 13”) denotes peak upstream from *argT* gene miss-called by SISRIS.

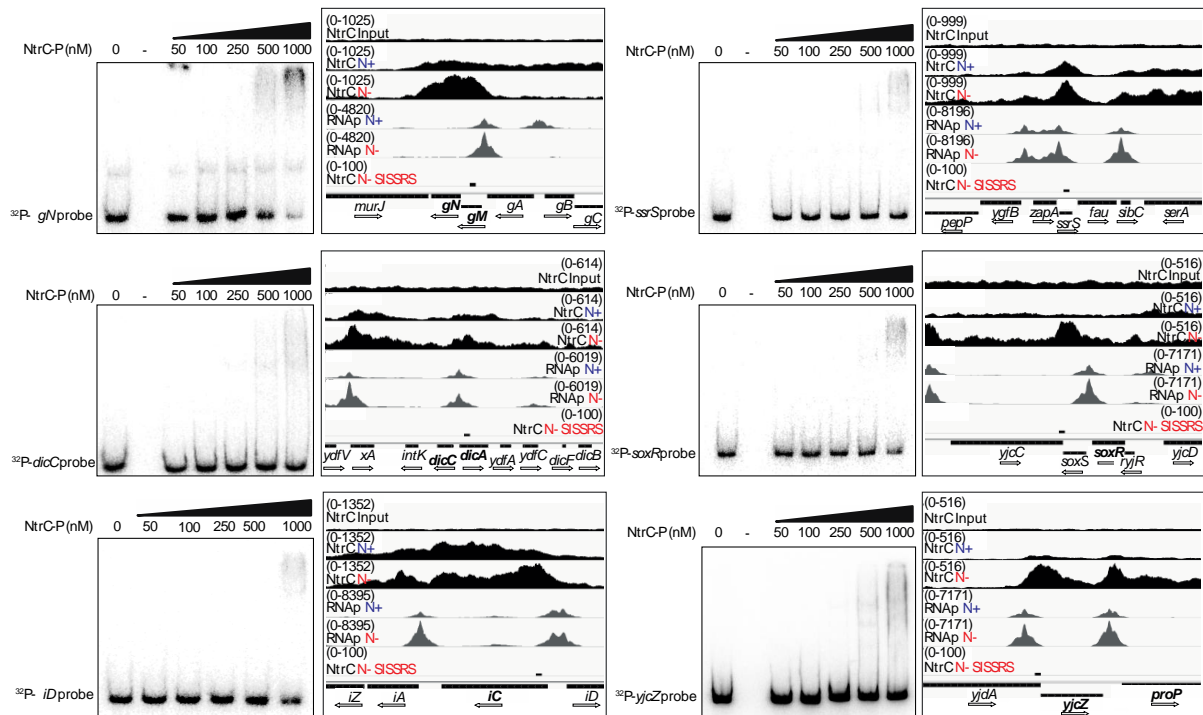

**Supplementary Figure 2.** Screenshots of Integrative Genome Viewer <sup>1</sup> with tracks showing the binding profiles (tag density) as measured by ChIP-seq of NtrC (black) and RNAP (gray) in N non-starved (denoted as N+) and N starved (denoted as N-) *E. coli* aligned against the upstream regions of transcription units *flgMN*, *dicC*, *fliC*, *ssrS*, *soxR* and *yjz-proP*. Here these are supplemented with representative autoradiographs of non-denaturing gels showing the binding of *in situ* phosphorylated NtrC to <sup>32</sup>P-labelled DNA probes with sequences corresponding to their respective upstream regions. Tracks with the input DNA control tag density (denoted as input) and with the genomic loci bound by NtrC identified by the SISSRS peak-calling algorithm <sup>2</sup> at t=N- are also shown for comparison.

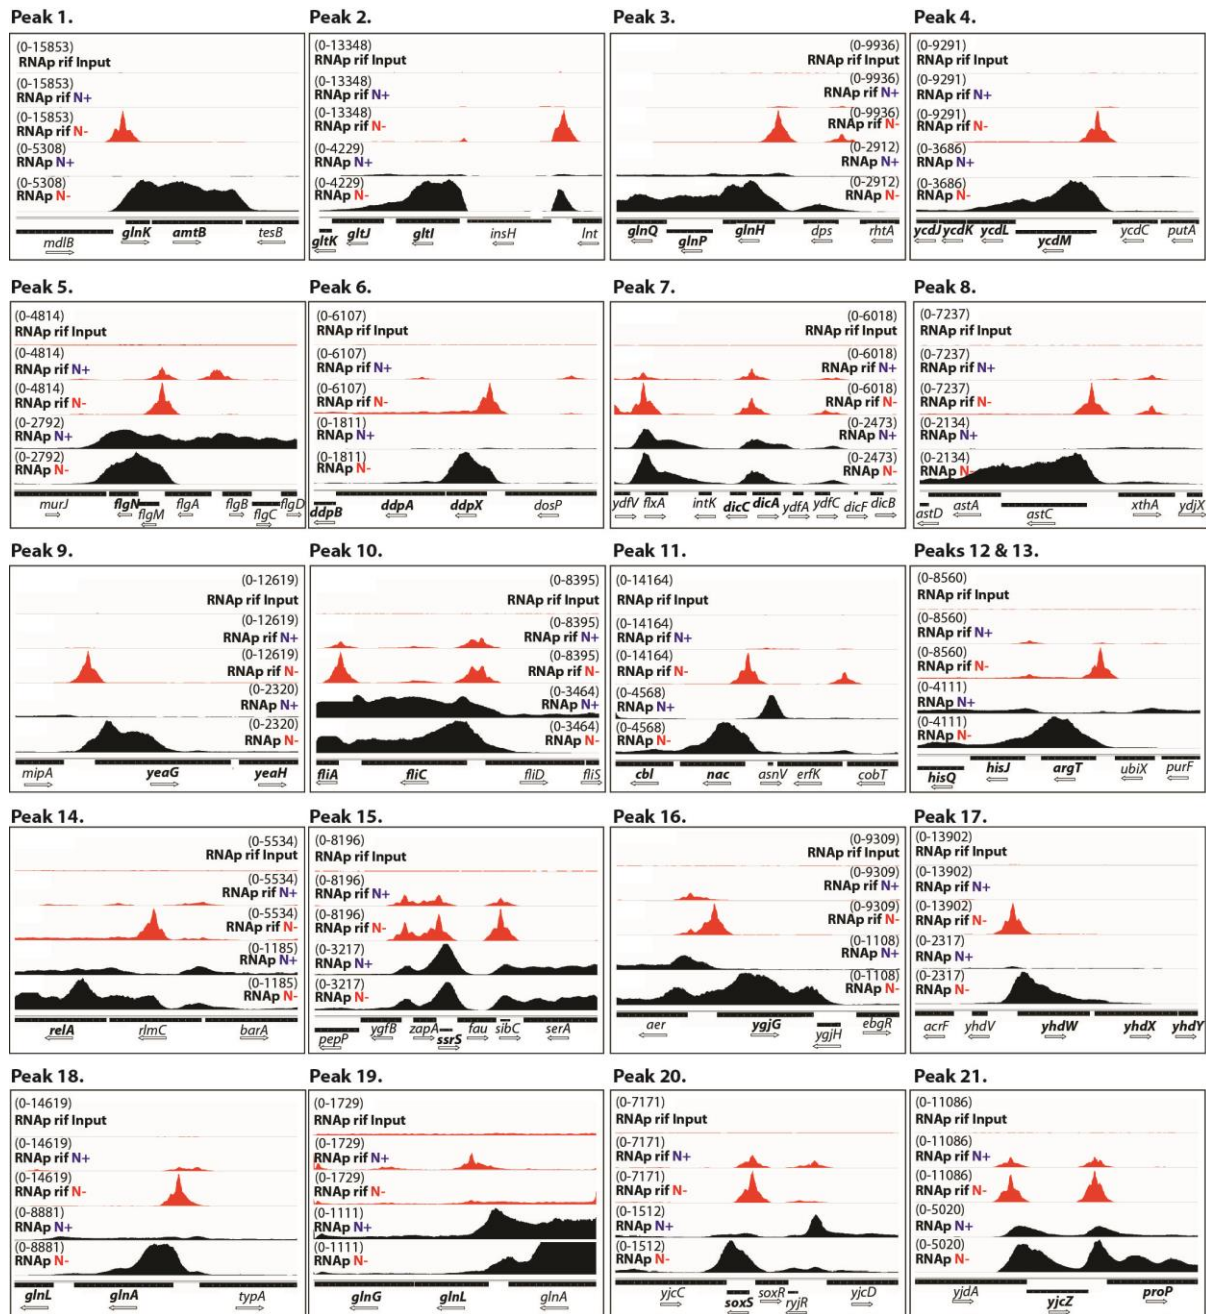

**Supplementary Figure 3.** Screenshots of Integrative Genome Viewer<sup>1</sup> with tracks showing the binding profiles (tag density) as measured by ChIP-seq of RNAP with Rifampicin treatment (red) and RNAP in the absence of Rifampicin treatment (black) in N non-starved (denoted as N+) and N starved (denoted as N-) *E. coli* aligned against the upstream regions of all the transcription units shown in Table 1. Tracks with the input DNA control tag density (denoted as input) is shown for comparison.

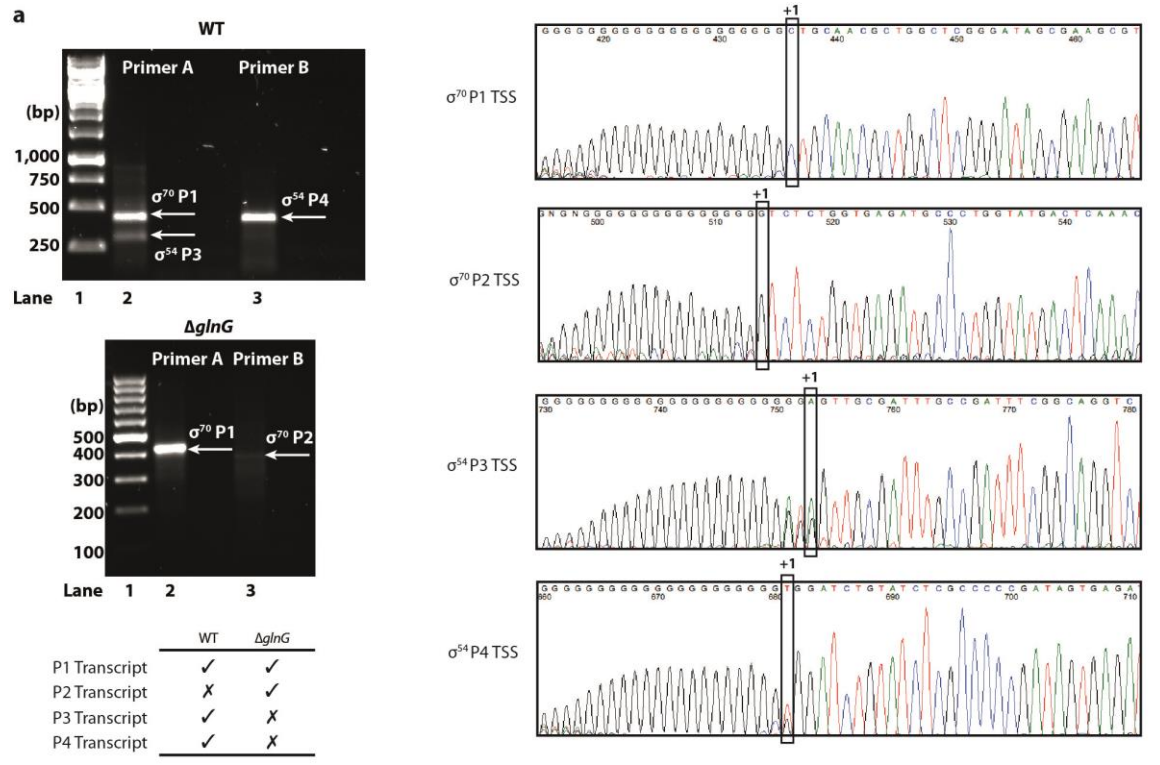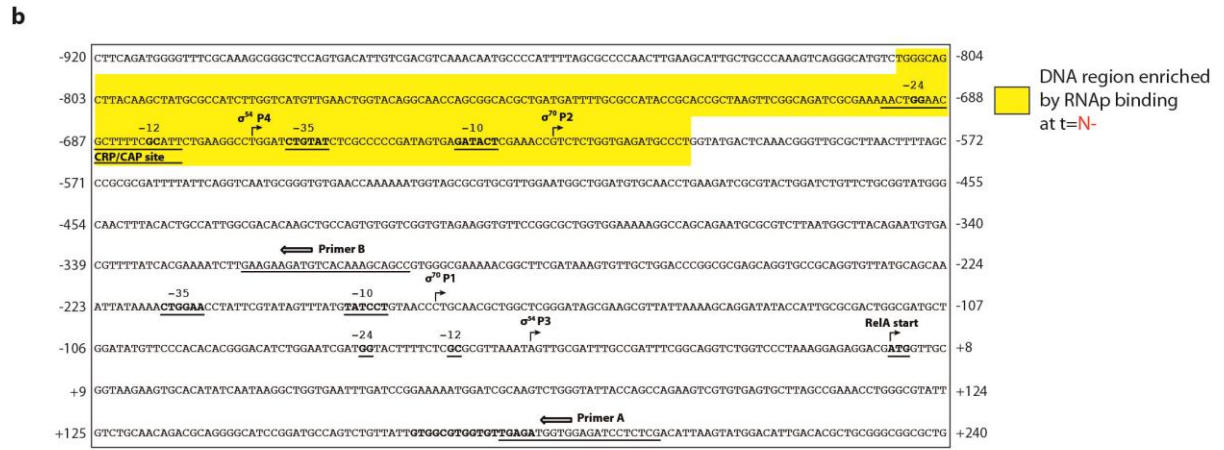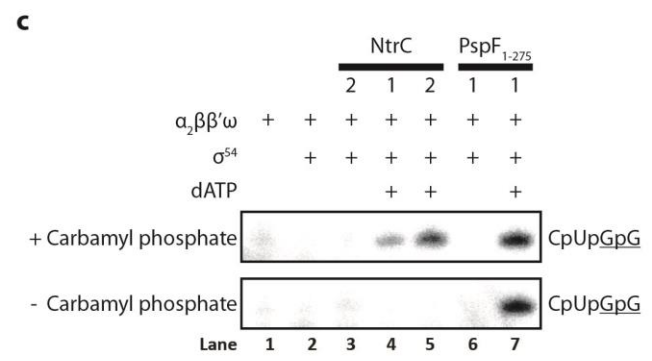

**Supplementary Figure 4.** Transcription start site mapping and NtrC-activated σ<sup>54</sup>-dependent transcription of *relA* from novel promoter P4 (A) Left. Representative image of agarose gels showing the 5'-RACE PCR products amplified from cDNA synthesised from total RNA

isolated from N starved wild-type NCM3722 and NCM3722: $\Delta$ *glnG* *E. coli* cells. The presence or absence of the different transcripts originating from promoters P1-4 in the N starved wild-type NCM3722 and NCM3722: $\Delta$ *glnG* *E. coli* is shown in the table below the agarose gel images. *Right.* DNA sequencing chromatograms (from FinchTV<sup>3</sup>) showing the transcription start sites (boxed) originating from promoters P1-4 in the regulatory region of *relA* determined by 5'-RACE analysis. **(B)** The DNA sequence of the *relA* regulatory region (from +240 to -920 with respect to the translation start site of RelA). The consensus -10/-35 of P1 and P2 promoters and -12/-24 elements of the P3 and P4 are shown in bold typeface and underlined; the CRP binding site is indicated and underlined. The transcription start sites of P1-P4 and the translation start site of RelA are indicated. The sequences of primers A and B used for making the cDNA for the 5'-RACE analysis are underlined and marked with an empty leftward pointing arrow. The DNA region (from -607 to -811 with respect to the translation start site of RelA) enriched in the immunoprecipitated sample by RNAP binding is highlighted in yellow. **(C)** Representative autoradiographs of 20% (w/v) denaturing urea gel showing the *in situ* phosphorylated NtrC dependent synthesis of CpUpGpG transcript (underlined nucleotides are  $\alpha^{32}\text{P}$  labelled) from the P4 promoter by  $\sigma^{54}$ -RNAP. The reaction components present in each lane are given at the top of the autoradiographs; lanes 6 and 7 are control lanes and show that the synthesis of CpUpGpG can be initiated from P4 by a non-DNA binding and phosphorylation-independent form of the  $\sigma^{54}$ -RNAP transcription activator PspF<sub>1-275</sub>.



**Supplementary Figure 5.** The alignment of DNA sequences of *relA* regulatory regions (corresponding to positions –1,000 to +100 of RelA transcription start site of *E. coli*) from representatives of the Enterobacteriaceae family (*Shigella*, *Salmonella*, *Citrobacter*, *Klebsiella*, *Serratia* and *Vibrio*). The regions corresponding to the NtrC binding region and the promoters P1-4 are boxed in cyan (NtrC), red (P1 and P2) orange (P3 and P4) and the translation start site of RelA is indicated.



## Transcription

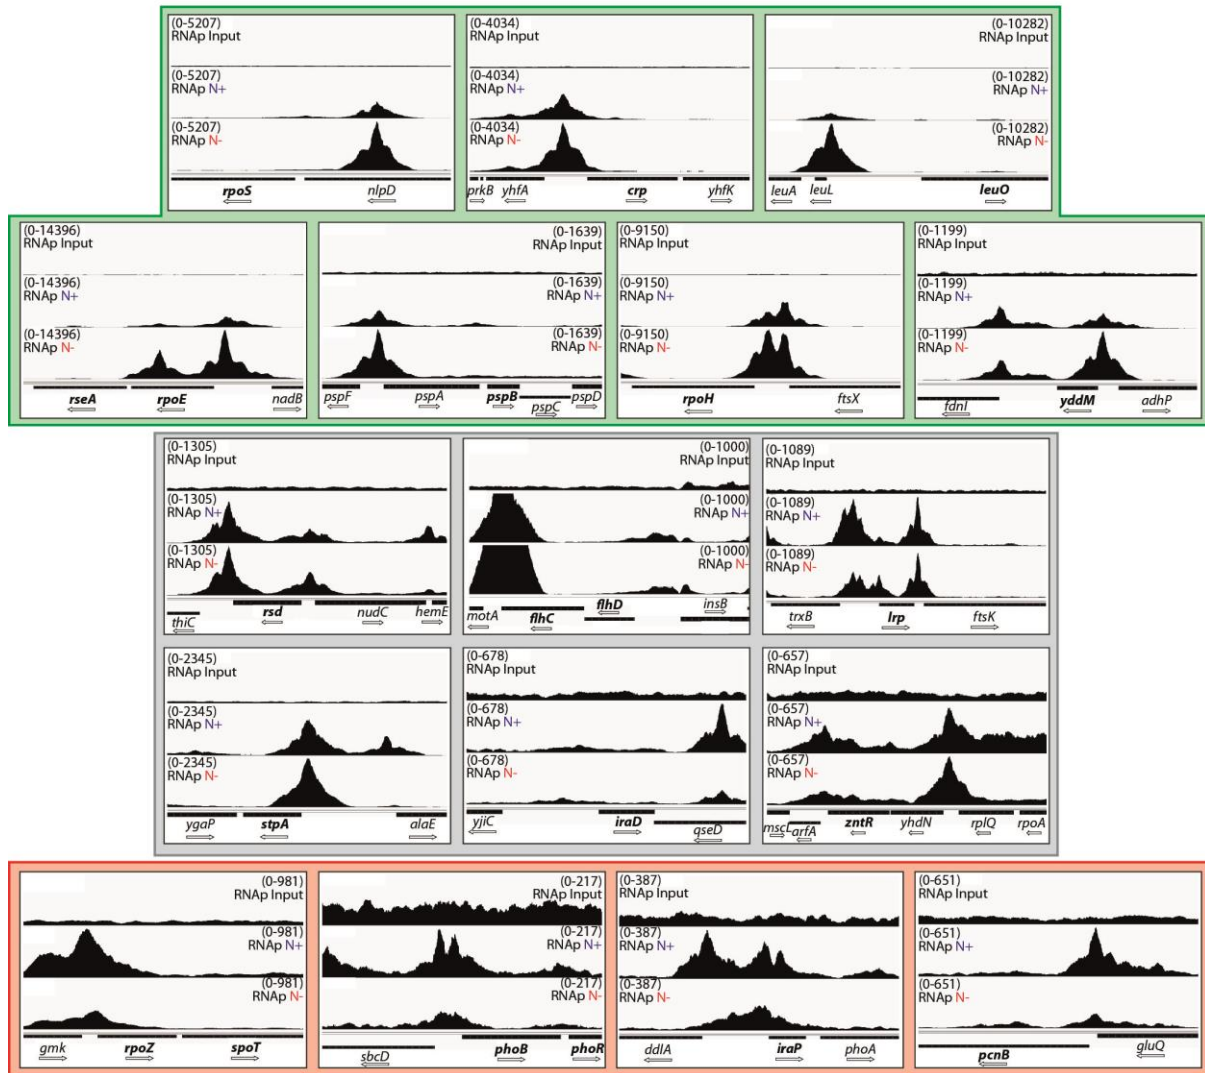

## Stress adaptation

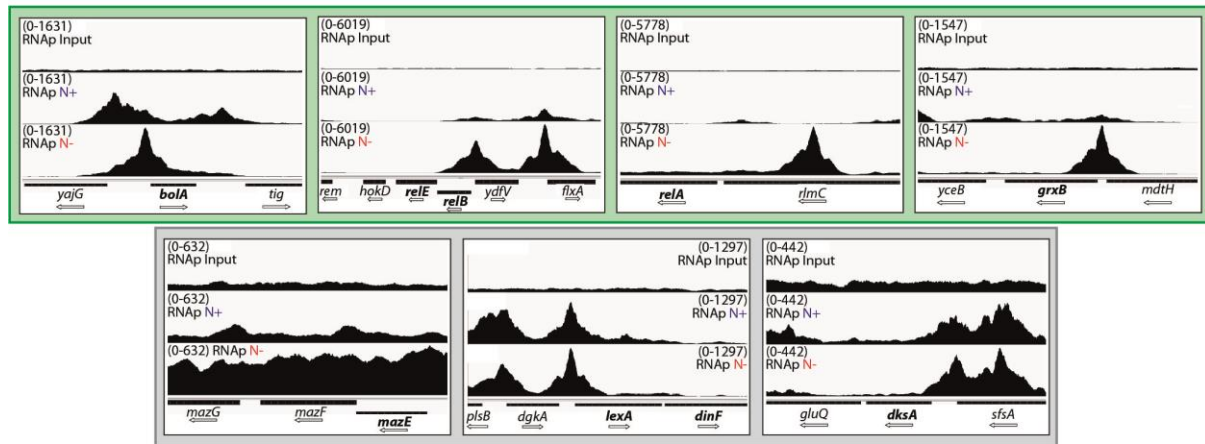

# Translation

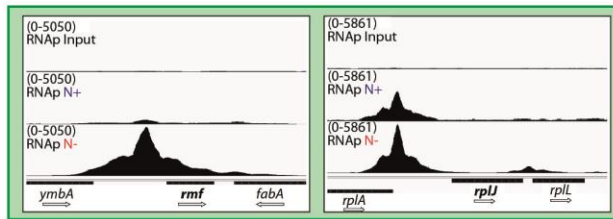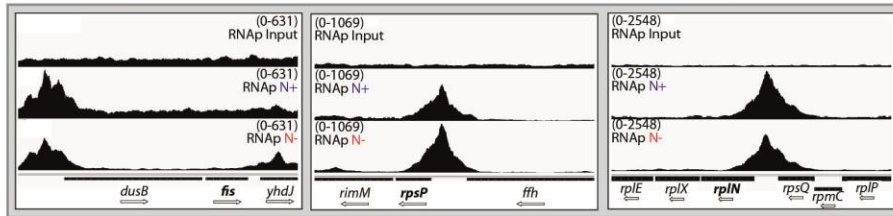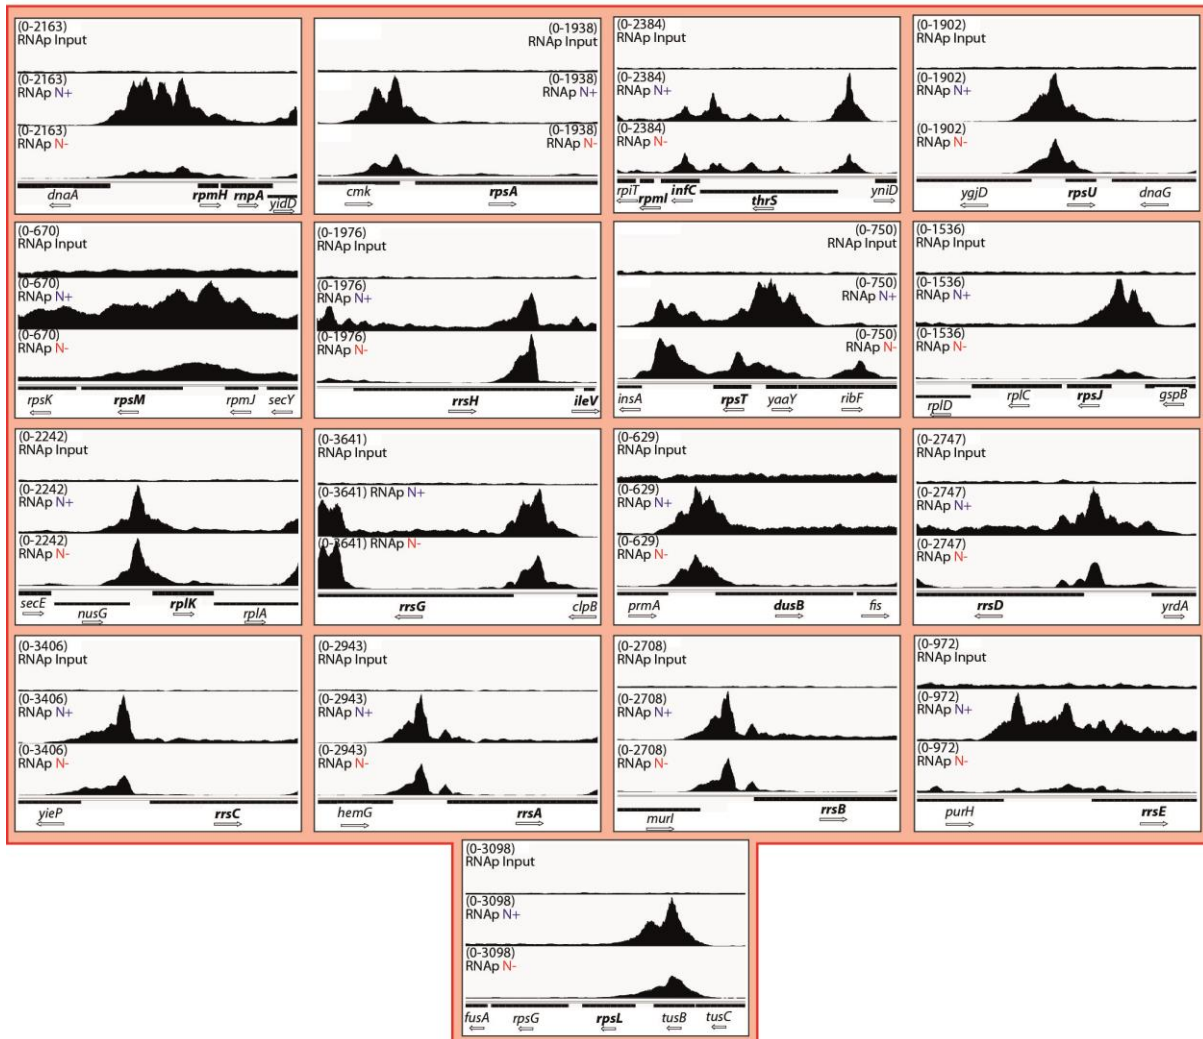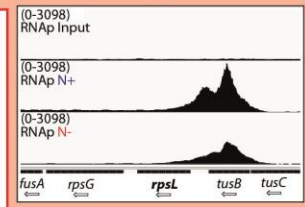

## Metabolism

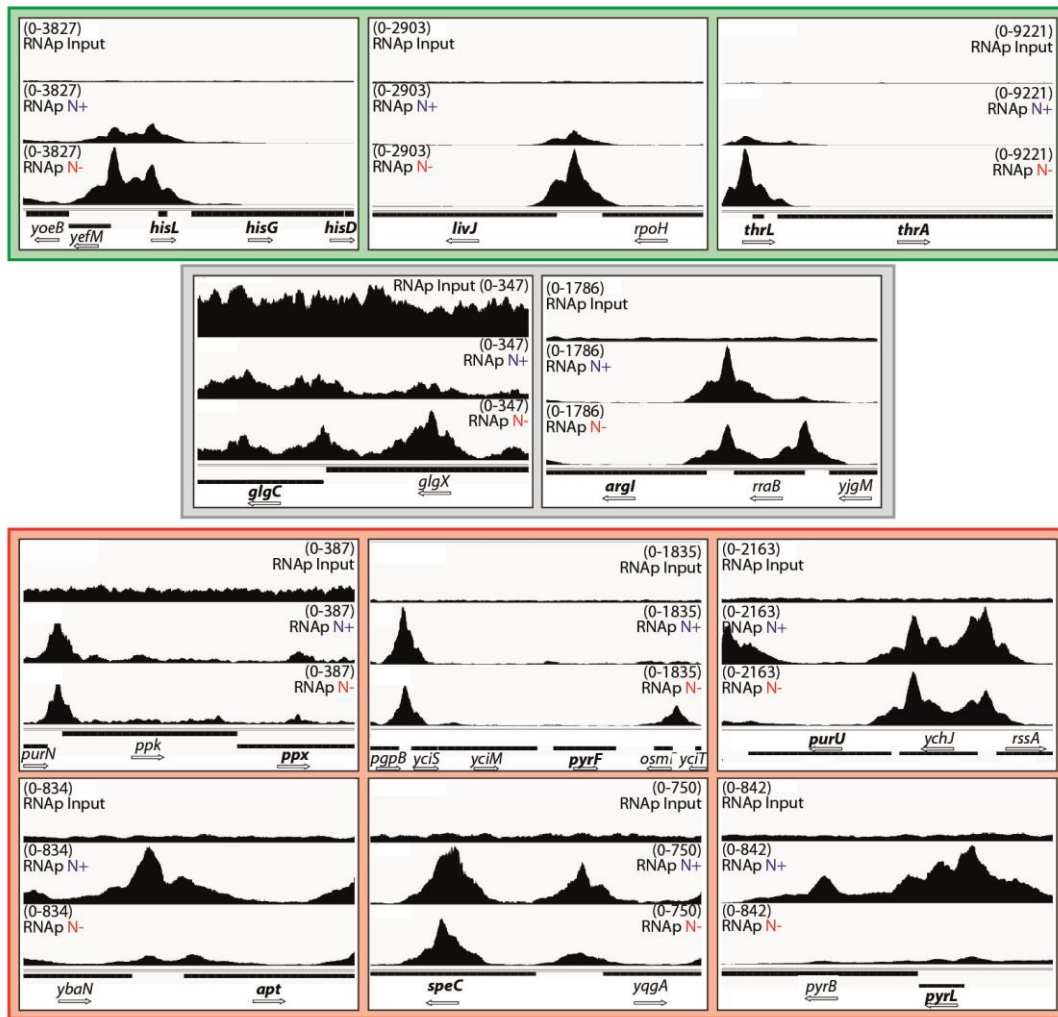

## Cell Division

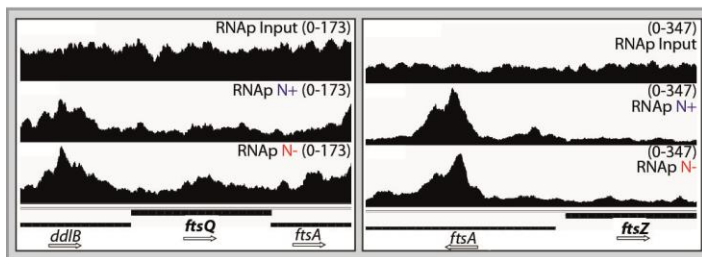

## DNA replication

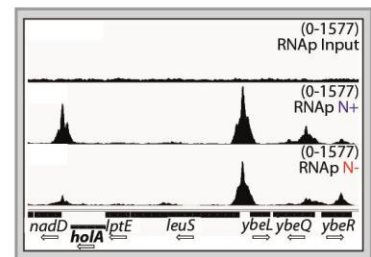

**Supplementary Figure 6.** Screenshots of Integrative Genome Viewer <sup>1</sup> with tracks showing the binding profiles (tag density) as measured by ChIP-seq of RNAP binding in N non-starved (denoted as N+) and N starved (denoted as N-) *E. coli* aligned against the upstream regions of all known ppGpp responsive promoters grouped into key cellular processes. A track with the input DNA control tag density (denoted as input) is shown for comparison. The screenshots in the green and red boxes denote promoters at which RNAP binding is positively

and negatively, respectively, affected by ppGpp during N starvation. The screenshots in gray boxes denote promoters at which RNAP binding remains unchanged at  $t=N^+$  and  $N^-$ .

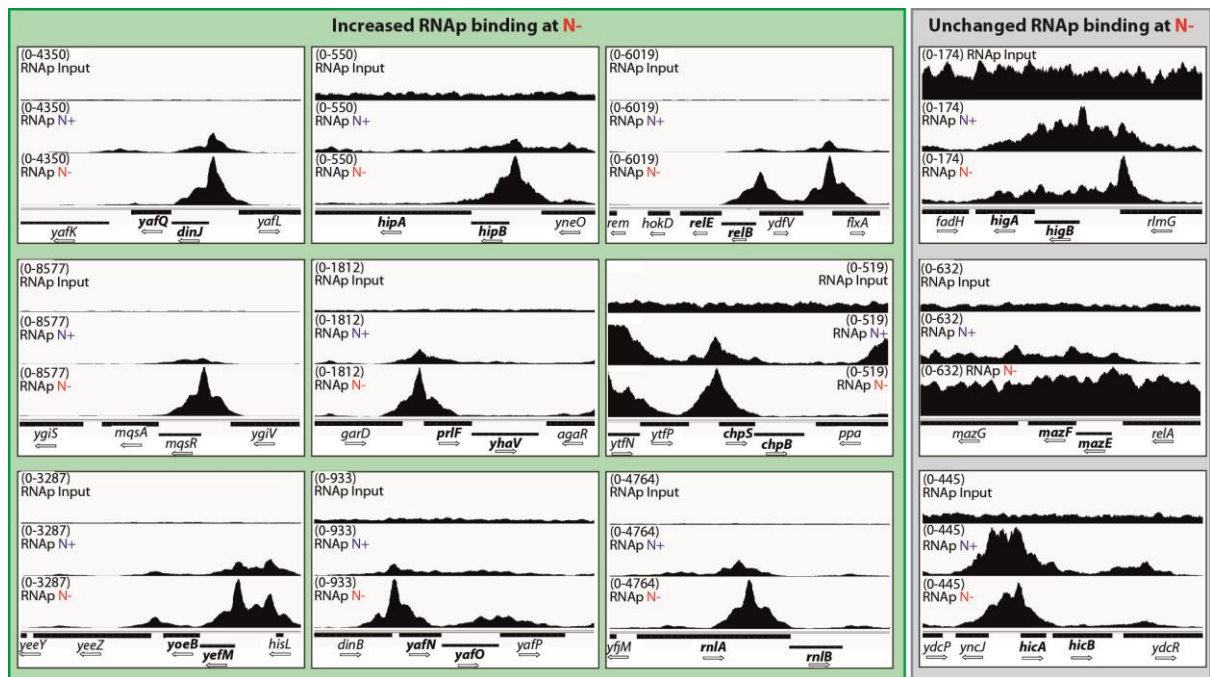

**Supplementary Figure 7.** Screenshots of Integrative Genome Viewer<sup>1</sup> with tracks showing the binding profiles (tag density) as measured by ChIP-seq of RNAP binding in N non-starved (denoted as N+) and N starved (denoted as N-) *E. coli* aligned against the upstream regions of toxin-antitoxin pair genes. A track with the input DNA control tag density (denoted as input) is shown for comparison. The screenshots in the green boxes denote promoters at which RNAP binding is positively affected by ppGpp during N starvation. The screenshots in gray boxes denote promoters at which RNAP binding remains unchanged at  $t=N+$  and  $N-$ .

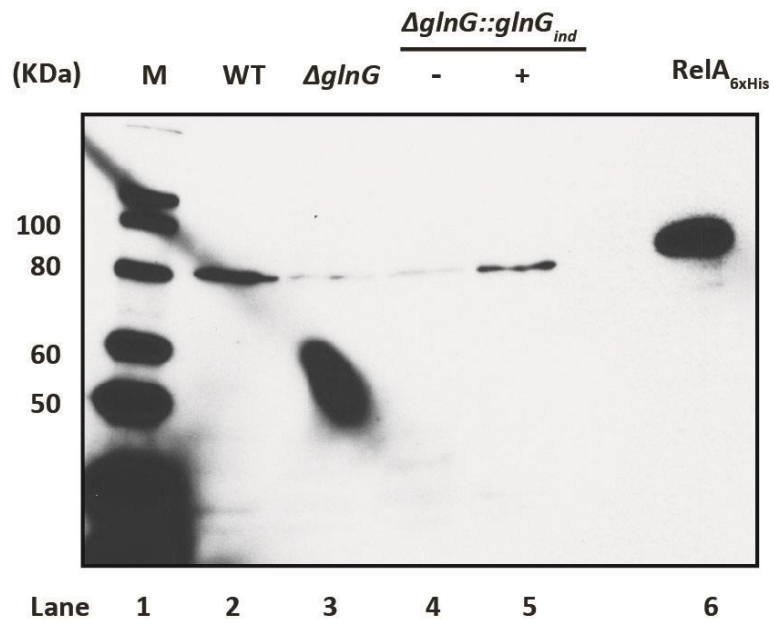

**Supplementary Figure 8.** Entire gel image of the RelA Western blot showing expression of RelA proteins in cells sampled at t=N- (as in Fig. 2C). Lane 1 contains the molecular weight marker and lane 6 contains purified *E. coli* RelA-6xHis protein.

**Supplementary Table 1. Gene expression analysis of ppGpp-dependent promoters**

| Gene        | Functional group  | Increased ppGpp effect (predicted) <sup>a</sup> | RNAp ChIP binding N- vs N+ | Fold change gene expression N- vs N+ |
|-------------|-------------------|-------------------------------------------------|----------------------------|--------------------------------------|
| <i>rpoS</i> | Transcription     | +                                               | +                          | ↑ 4.59 ±0.75                         |
| <i>crp</i>  | Transcription     | +                                               | +                          | ↑ 2.41 ±0.36                         |
| <i>leuO</i> | Transcription     | +                                               | +                          | ↓ 2.88 ±1.03                         |
| <i>rpoE</i> | Transcription     | +                                               | +                          | ↑ 2.06 ±0.30                         |
| <i>pspB</i> | Transcription     | +                                               | +                          | ↑ 5.88 ±1.05                         |
| <i>rpoH</i> | Transcription     | +                                               | +                          | ↑ 7.23 ±1.04                         |
| <i>yddM</i> | Transcription     | +                                               | +                          | ↑ 2.78 ±0.88                         |
| <i>rsd</i>  | Transcription     | +                                               | nc                         | ↑ 2.77 ±0.60                         |
| <i>flhD</i> | Transcription     | -                                               | nc                         | ↓ 3.76 ±0.77                         |
| <i>lrp</i>  | Transcription     | +                                               | nc                         | 0.67 ±0.14                           |
| <i>stpA</i> | Transcription     | -                                               | nc                         | ↑ 2.28 ±0.52                         |
| <i>iraD</i> | Transcription     | +                                               | nc                         | 1.06 ±0.36                           |
| <i>zntR</i> | Transcription     | +                                               | nc                         | ↑ 2.81 ±0.76                         |
| <i>rpoZ</i> | Transcription     | -                                               | -                          | 0.76 ±0.21                           |
| <i>phoB</i> | Transcription     | +                                               | -                          | ↑ 2.23 ±0.09                         |
| <i>iraP</i> | Transcription     | +                                               | -                          | ↑ 3.23 ±1.29                         |
| <i>pcnB</i> | Transcription     | -                                               | -                          | 0.64 ±0.06                           |
| <i>bolA</i> | Stress adaptation | +                                               | +                          | ↑ 5.69 ±1.80                         |
| <i>relB</i> | Stress adaptation | +                                               | +                          | ↑ 3.65 ±1.50                         |
| <i>relA</i> | Stress adaptation | +                                               | +                          | ↑ 6.78 ±0.75                         |
| <i>mazE</i> | Stress adaptation | -                                               | nc                         | ↑ 3.68 ±0.50                         |
| <i>grxB</i> | Stress adaptation | +                                               | +                          | 1.86 ±0.18                           |
| <i>lexA</i> | Stress adaptation | +                                               | nc                         | ↑ 6.01 ±0.58                         |
| <i>dksA</i> | Stress adaptation | -                                               | nc                         | 1.31 ±0.40                           |
| <i>rmf</i>  | Translation       | +                                               | +                          | ↑ 4.09 ±1.84                         |
| <i>rplJ</i> | Translation       | -                                               | +                          | ↓ 4.33 ±1.30                         |
| <i>fis</i>  | Translation       | -                                               | nc                         | ↓ 18.83 ±3.52                        |
| <i>rpsP</i> | Translation       | -                                               | nc                         | ↓ 8.69 ±1.51                         |
| <i>rplN</i> | Translation       | -                                               | nc                         | 0.64 ±0.17                           |
| <i>rpmH</i> | Translation       | -                                               | -                          | ↓ 8.01 ±1.78                         |
| <i>rpsA</i> | Translation       | -                                               | -                          | ↓ 4.98 ±2.06                         |
| <i>thrS</i> | Translation       | -                                               | -                          | ↑ 3.73 ±0.71                         |
| <i>rpsU</i> | Translation       | -                                               | -                          | ↓ 21.70 ±3.36                        |
| <i>rpsM</i> | Translation       | -                                               | -                          | 0.56 ±0.13                           |
| <i>rrsH</i> | Translation       | -                                               | -                          | No array data                        |
| <i>rpsT</i> | Translation       | -                                               | -                          | ↓ 5.10 ±2.27                         |
| <i>rpsJ</i> | Translation       | -                                               | -                          | ↓ 12.62 ±6.99                        |
| <i>rplK</i> | Translation       | -                                               | -                          | ↓ 4.84 ±1.81                         |
| <i>rrsG</i> | Translation       | -                                               | -                          | No array data                        |
| <i>dusB</i> | Translation       | -                                               | -                          | ↓ 26.35 ±4.17                        |
| <i>rrsD</i> | Translation       | -                                               | -                          | No array data                        |
| <i>rrsC</i> | Translation       | -                                               | -                          | No array data                        |
| <i>rrsA</i> | Translation       | -                                               | -                          | No array data                        |

|             |                 |   |    |               |
|-------------|-----------------|---|----|---------------|
| <i>rrsB</i> | Translation     | - | -  | No array data |
| <i>rrsE</i> | Translation     | - | -  | No array data |
| <i>rpsL</i> | Translation     | - | -  | ↓ 5.77 ±1.64  |
| <i>hisG</i> | Metabolism      | + | +  | ↑ 2.63 ±0.45  |
| <i>livJ</i> | Metabolism      | + | +  | ↑ 3.92 ±1.71  |
| <i>thrA</i> | Metabolism      | + | +  | ↓ 4.33 ±2.4   |
| <i>glgC</i> | Metabolism      | + | nc | 1.75 ±0.47    |
| <i>argI</i> | Metabolism      | + | nc | ↑ 2.52 ±0.60  |
| <i>ppx</i>  | Metabolism      | - | -  | ↓ 4.88 ±0.74  |
| <i>pyrF</i> | Metabolism      | - | -  | ↓ 6.41 ±1.72  |
| <i>purU</i> | Metabolism      | - | -  | ↓ 2.71 ±0.10  |
| <i>apt</i>  | Metabolism      | - | -  | ↓ 56.18 ±5.37 |
| <i>speC</i> | Metabolism      | - | -  | 0.74 ±0.05    |
| <i>pyrL</i> | Metabolism      | - | -  | 0.64 ±0.10    |
| <i>ftsQ</i> | Cell Division   | + | nc | 1.10 ±0.18    |
| <i>ftsZ</i> | Cell Division   | + | nc | ↑ 4.16 ±1.44  |
| <i>hola</i> | DNA replication | - | nc | ↓ 3.04 ±0.56  |

Red indicates decrease, green indicates increase & grey indicates no change

<sup>a</sup> Predictions of changes in gene expression from an increase in cellular ppGpp levels are derived from Ecocyc<sup>4</sup>



**Supplementary Table 2. TaqMan *E. coli* gene expression primer and probe sequences used in this study**

| <b>Gene</b>        | <b>Forward primer (5'-3')</b> | <b>Reverse Primer (5'-3')</b> | <b>FAM Reporter probe (5'-3')</b> |
|--------------------|-------------------------------|-------------------------------|-----------------------------------|
| <i>glnK</i>        | GGGCATGCCGAGCTGTA             | ATCAGCAATCGCCACATCAATTTT      | CAGCGTCAATTTTCCTG                 |
| <i>relA</i>        | CGGGACATGAAGACCGGATT          | ATCTCTTCCTGCCACGCAAT          | CCTGGCTGCGTAAACT                  |
| <i>16S<br/>RNA</i> | CCCCCTGGACGAAGACTGA           | GTGGACTACCAGGGTATCTAATCCT     | TCCCCACGCTTTTCG                   |

Supplementary Table 3. EMSA probe and primer sequences

| Probe name                     | Probe sequence 5'-3' (Primer sequences bold and underlined)                                                                                                                                                                                                                                                                                                                                                                 |
|--------------------------------|-----------------------------------------------------------------------------------------------------------------------------------------------------------------------------------------------------------------------------------------------------------------------------------------------------------------------------------------------------------------------------------------------------------------------------|
| <i>glnA</i> probe<br>(344bp)   | <u><b>GTCCCTTTGTGATCGCTTTCA</b></u> CGGAGCATAAAAAGGGTTATCCAAAGGTCATTGCACCAA<br>CATGGTGCTTAATGTTTCCATTGAAGCACTATATTGGTGCAACATTACATCGTGGTGCA<br>GCCCTTTTGCACGATGGTGCGCATGATAACGCCTTTTAGGGGCAATTTAAAAGTTGGCAC<br>AGATTTTCGCTTTATCTTTTTTACGGCGACACGGCCAAAATAATTGCAGATTTTCGTTACCA<br>CGACGACCATGACCAATCCAGGAGAGTTAAAGTATGTCCGCTGAACACGTACTGACGATG<br>CTGAACGAGCACGAAGTGAAGTTTT <b><u>GTTGATTTGCGCTTACC</u></b> GA                |
| <i>relA</i> probe<br>(336 bp)  | <b><u>CACAGCAACTTCAGATGGGG</u></b> TTTCGCAAAGCGGGCTCCAGTGACATTGTTCGACGTCAAAC<br>AATGCCCCATTTTAGCGCCCAACTTGAAGCATTGCTGCCCAAAGTCAGGGCATGTCTGG<br>GCAGCTTACAAGCTATGCGCCATCTTGGTCATGTTGAACTGGTACAGGCAACCAGCGGCA<br>CGCTGATGATTTTGCGCCATACCGCACCGCTAAGTTCGGCAGATCGCGAAAACTGGAAC<br>GCTTTTCGCATTCTGAAGGCCTGGATCTGTATCTCGCCCCGATAGTGAGATACTCGAAA<br>CCGTCTCTGGTGAGAT <b><u>GCCCTGGTATGACTCAAACG</u></b>                            |
| <i>dicC</i> probe<br>(347 bp)  | <b><u>ACGAATACCTGCTGCTTGTG</u></b> CAAGTTTTGTTTTTGAACCGAAATACAAAAGAGCGTCAGT<br>TTTAAGCATTTAAAACACCTTTATTGTTAGTCATAACTAACAAGATAGATGTTAACAAAA<br>ACATAGTCAATACGATTTAGCATTAGCTAACTATGGAACAAAAAATTTAACTATCGGCG<br>AACGCATCAGGTATCGTCGGAACCACTCAAACACACCCAAAGGTCTCTTGCTAAAGCCC<br>TGAAAATCTCCCATGTGTCTGTATCACAATGGGAACGGGGTGATAGTGAACCTACAGGGA<br>AGAACCTTTTTGCCCCTCAGTAAAGTAT <b><u>TGCAATGCTCACCAACATGG</u></b>                |
| <i>flgMN</i> probe<br>(312 bp) | <b><u>CTTGCTGCGCTTCGTTGAT</u></b> CAGCGCATCGGCAATTTTGCCGGTGTCCATTTTTAGTTTAC<br>CGTTACGAATCGCCAGTTTTAACGCTTCGACACGTTCAAGATTGATATCACTGCTGCCGG<br>GTTGCATCAGTTTTGCTTGCCTGCTGCTTAAACGTCACACTGGTGTGGTGGAGGCGGTTG<br>TTTTTGCCGCCCGGCTGTTTCGTTACCGGCGCGTCAGTGGTTTTCGCGCGGTTGAACGGTGC<br>TTACAGGCTTCAGAGGCGAAGTGCATCAATACTCATGGTTTTATTCTCAT <b><u>TGAGGGCGC</u></b><br><b><u>TTTTATCATGTG</u></b>                                   |
| <i>ynfB</i> probe<br>(330 bp)  | <b><u>ATCACTCTCAGCAAACGAATCG</u></b> GCCTGCTCGCTATTCTGCTGCCTTGCGCACCTGGCATTG<br>AGCACAACGTTCATGCCGAAACTAACAAACTGGTGATTGAGTCTGGCGACAGTGCACAA<br>AGCCGCCAGCACGCCGCTATGGAAGAAAGAGCAATGGAATGACACGCGCAATCTGCGCCAG<br>AAAGTGAATAAACGCACCTGAAAAAGAGTGGGATAAAGCCGACGCCGCTTTTGATAACCGC<br>GATAAATGTGAGCAAAGCGCCAACATCAATGCCTACTGGGAGCCCAATACTTTGCGCTGC<br>CTGGACCGT <b><u>GAAC TGCCGCGTTATTACC</u></b>                               |
| <i>fliC</i> probe<br>(359 bp)  | <b><u>TTAGTACCGGTAGTGGCCTG</u></b> TACCGTCAGTTCACGCACACGCTGTAAGTTGTTGTTGATT<br>TCGGACAGCGCGCCTTCGGTGGTCTGCGCAACGGAGATACCGTCGTTGGCGTTACGGGCC<br>GCCTGAGTCAGGCCTTTAATGTTAGAGGTGAAACGGTTAGCAATCGCCTGACCCGCTGCG<br>TCATCCTTCGCGCTGTTAATACGCAAGCCAGAAGACAGACGCTCGATAGAACTCGACAGC<br>GCAGACTGGTTCTTGTGATATTATTTTGTGATGATCAGCGAGAGGCTGTTGGTATTAATG<br>ACTTGTGCCATGATTTCGTTATCCTATATTGCAAGT <b><u>CGTTGATTACGTATTGGGTTTTCCA</u></b> |
| <i>ssrS</i> probe<br>(346 bp)  | <b><u>TTGAACAAGGTTCGCATCACC</u></b> GAAAAAATAACCAAACCTTTGAATGACACTTTTTCGGTTT<br>ACTGTGGTAGAGTAACCGTGAAGACAAAATTTCTCTGAGATGTTTCGCAAGCGGGCCAGTC<br>CCCTGAGCCGATATTTTATACCACAAGAATGTGGCGCTCCGCGGTTGGTGAGCATGCTCG<br>GTCCGTCCGAGAAGCCTTAAAACCTGCGACGACACATTCACCTTGAACCAAGGGTTCAAGG<br>GTTACAGCCTGCGGCGGCATCTCGGAGATTCCTTCTTATCTGGCACCAGCCATGACGCA<br>ACTACCAGAACTCCCCTGACATTAT <b><u>CCCGACAAGAAATCCGCAA</u></b>                |
| <i>serA</i> probe<br>(331 bp)  | <b><u>TCAGCCAGAATGCCCAATTG</u></b> CGTACCAATATGACCGTAGCCGATGATACCCAGCTTTTTT<br>CCGCGCGCTTCAAAGAACCAGCCGCGCAGTTTGTTCACACGCGCCAGGTGCGCTTTAGCA<br>TTGGCTTCCGGCACGCCGCGCAATAGCAGCAGCAGTTTCGCAATCACCAGCTCCGCAACA<br>GAGCGCGTATTTGAGAAGGTCGTTAAATACCGGGATCCCGCGCTTTGCCGCCGATCC<br>AGATCAACCTGGTTTTGTTCCGATACAGAAACAGCCAATAGCGACCAGTTTTTTCTGCGGCG<br>TTGATCACGT <b><u>TTTTCAGTCAGATGGGTACGG</u></b>                                |
| <i>yjcC</i> probe<br>(340 bp)  | <b><u>CGGAACACATCATCGAGCTG</u></b> GCGCACAGCCTGGGGTTAAAAACGATCGCTGAAGGCGTCG<br>AAACTGAGGAGCAGGTTAACTGGCTGCGCAAACGCGGCGTGCCTATTGCCAGGGATGGT<br>TCTTTGCGAAGGCGATGCCGCCGAGGTGTTTATGCAATGGATGGAGCAATTACCCGCGC<br>GGGAGTTAACGCGCGGGCAATAAAATTACAGGCGGTGGCGATAATCGCTGGGAGTGCAT<br>CAAACCTGCCGACGGAACCGCGGAGAGGTTCTGCTGCGAGACATAACCCAGGTCCATTG<br>CGATATCAAAAATCGGACGCT <b><u>CGGTGGTGC</u></b> CAACTCAAC                          |

#### Supplementary Table 4. Primer sequences for 5'RACE PCR used in this study

| Primer                     | Primer sequence (5'-3') |
|----------------------------|-------------------------|
| GSP1_ <i>relA</i> (set A)  | CGTGTCAATGTCCATACT      |
| GSP2_ <i>relA</i> (set A)  | CGAGAGGATCTCCACCATCTCA  |
| GSP3_ <i>relA</i> (set A)  | CATCTCAACACCACGCCAC     |
| GSP1_ <i>relA2</i> (set B) | CCAGCAACACTTTATCG       |
| GSP2_ <i>relA2</i> (set B) | GGCTGCTTTGTGACATCTTCTTC |
| GSP3_ <i>relA2</i> (set B) | CTGTAAGCCATTAAGACGCGC   |

#### Supplementary References

- 1 Thorvaldsdóttir, H., Robinson, J. T. & Mesirov, J. P. Integrative Genomics Viewer (IGV): high-performance genomics data visualization and exploration. *Briefings in bioinformatics* **14**, 178-192, doi:10.1093/bib/bbs017 (2013).
- 2 Narlikar, L. & Jothi, R. ChIP-Seq data analysis: identification of protein-DNA binding sites with SISSRs peak-finder. *Methods in molecular biology (Clifton, N.J.)* **802**, 305-322, doi:10.1007/978-1-61779-400-1\_20 (2012).
- 3 FinchTV (Geospiza Inc. <http://www.geospiza.com/Products/finchtv.shtml>).
- 4 Keseler, I. M. *et al.* EcoCyc: fusing model organism databases with systems biology. *Nucleic acids research* **41**, D605-612, doi:10.1093/nar/gks1027 (2013).
